# Supplementary material for: Comprehensive Analysis of Mitochondrial Metabolism Related Molecular Subtypes and Prognostic Scoring Model Index Construction in Breast Cancer
Source: Research Square preprint supplement (doi:10.21203/rs.3.rs-8286839/v1), 2025-12-30
Supplement: Supplementary file 1 [file 446dee3514ea943e101e4f3e.docx]

**Supplementary Table 3. Tetransfection shRNAs.**

| sh-RNA | Target Seq |
| --- | --- |
| sh-MTDH-158 | 5′-CCGGCCAAGTCAAATACCAAGCAAACTCGAGTTTGCTTGGTATTTGACTTGGTTTTT -3′ |
| sh-MTDH-159 | 5′-CCGGGGAGAAGTGGAACTCCGTTTCCTCGAGGAAACGGAGTTCCACTTCTCCTTTTT -3′ |
| sh-MTDH-160 | 5′-CCGGGCTGATCCCAACTCTGATTGGCTCGAGCCAATCAGAGTTGGGATCAGCTTTTT -3′ |
| sh-NC | 5′- TTCTCCGAACGTGTCACGT -3′ |
