# Supplementary material for: Comprehensive Analysis of Mitochondrial Metabolism Related Molecular Subtypes and Prognostic Scoring Model Index Construction in Breast Cancer
Source: Research Square preprint supplement (doi:10.21203/rs.3.rs-8286839/v1), 2025-12-30
Supplement: Supplementary file 2 [file 659d97351d8f41935067b5cb.docx]

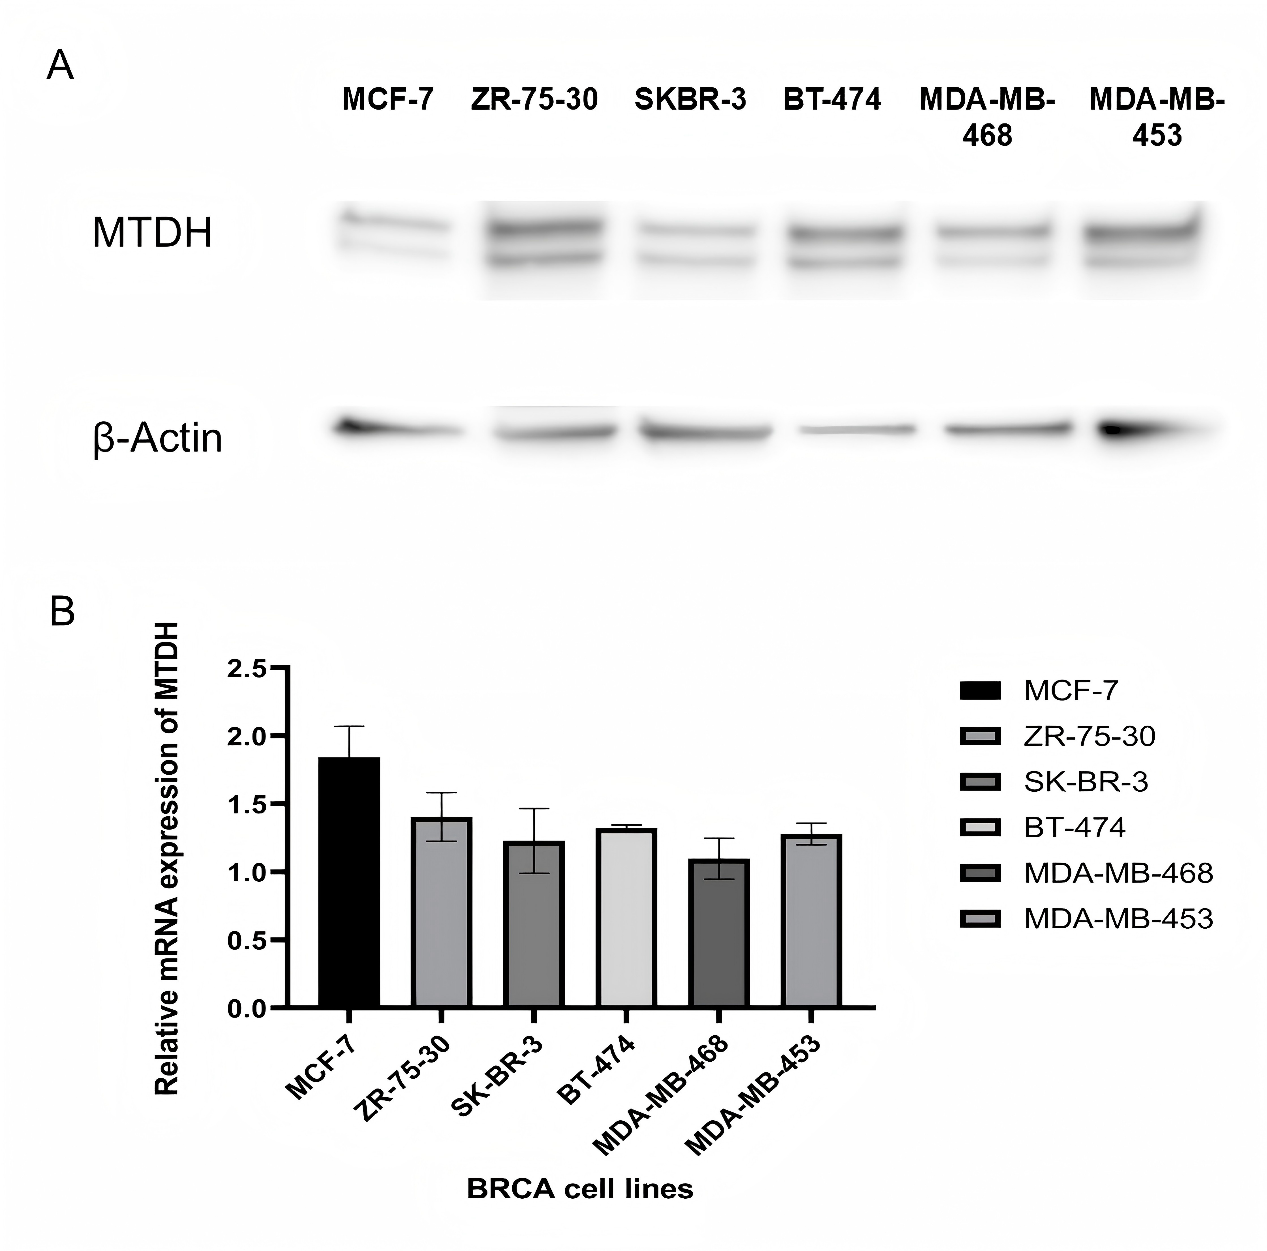


**Supplementary Figure 1. The expression of MTDH in different BRCA cell lines.**

1. The protein expression of MTDH in different BRCA cell lines.
2. The mRNA expression of MTDH in different BRCA cell lines.
