# Supplementary material for: Comprehensive Analysis of Mitochondrial Metabolism Related Molecular Subtypes and Prognostic Scoring Model Index Construction in Breast Cancer
Source: Research Square preprint supplement (doi:10.21203/rs.3.rs-8286839/v1), 2025-12-30
Supplement: Supplementary file 3 [file a4eba2000bd39a1433cf26a6.docx]

**Supplementary Table 4. Primer sequences for real-time PCR.**

| Gene | Forward primer | Reverse primer |
| --- | --- | --- |
| MTDH | 5′-GAACCGGAAGAAACTGTCCGAGAAG -3′ | 5′-TGCTGTTACACTTTGAGGTGTTCG -3′ |
| GAPDH | 5′- TGACTTCAACAGCGACACCCA -3′ | 5′- CACCCTGTTGCTGTAGCCAAA -3′ |
| β-Actin | 5′- CCTTGCACATGCCGGAG -3′ | 5′- GCACAGAGCCTCGCCTT -3′ |
