# Supplementary material for: Comprehensive Analysis of Mitochondrial Metabolism Related Molecular Subtypes and Prognostic Scoring Model Index Construction in Breast Cancer
Source: Research Square preprint supplement (doi:10.21203/rs.3.rs-8286839/v1), 2025-12-30
Supplement: Supplementary file 4 [file b3b4251b8e7bfb4187bfe2ec.docx]

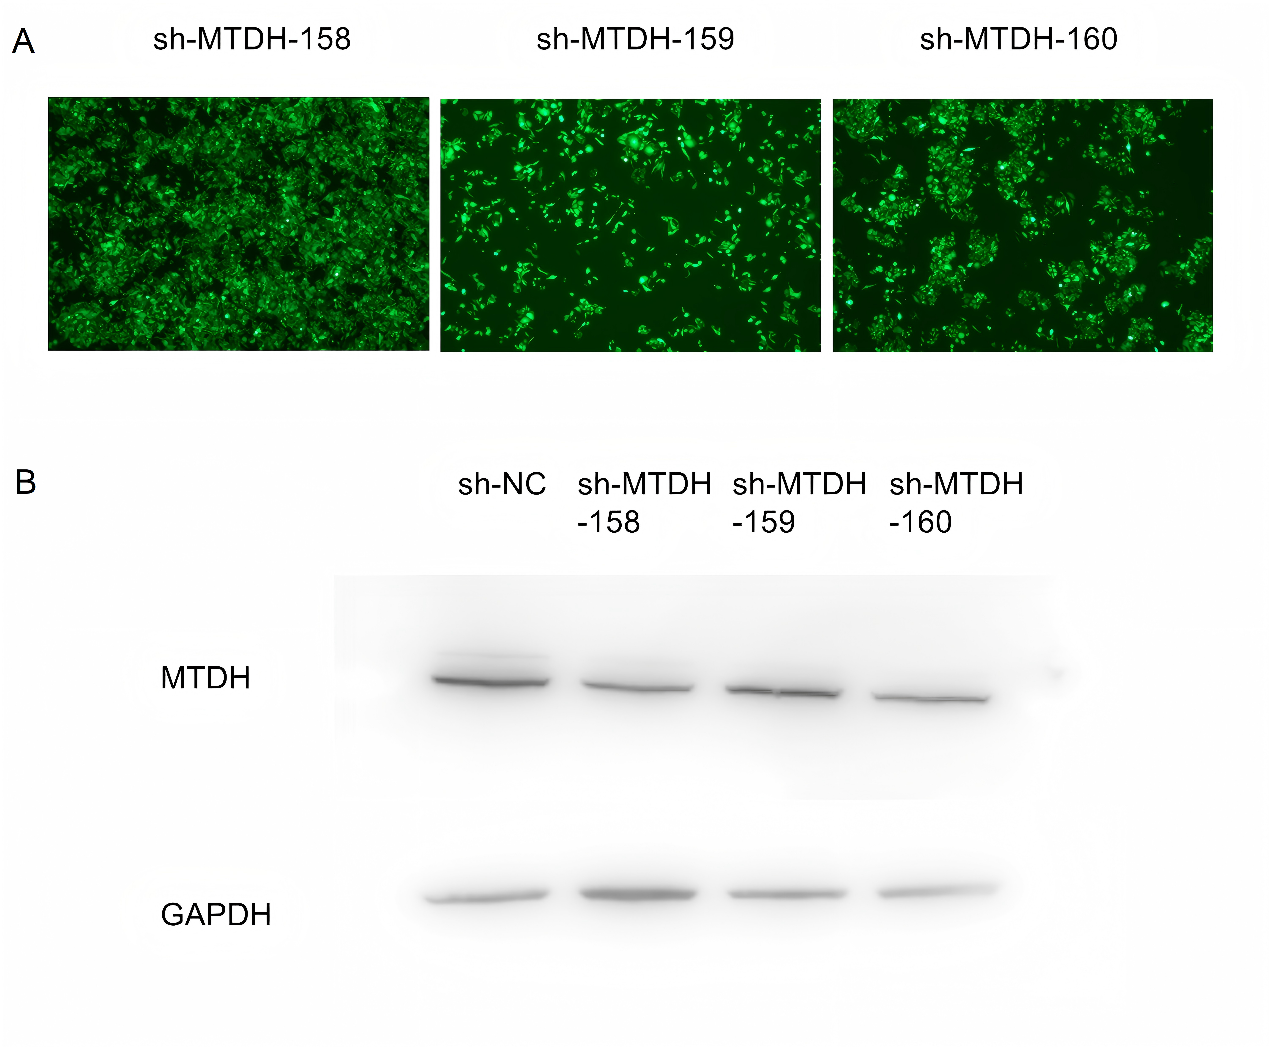


**Supplementary Figure 2. Lentiviruse transfection.**

1. At 72 hours after transfection.
2. Evaluation of the knockdown efficiency by western blot. We slected sh-MTDH-160 to do next exptriments.
